# Supplementary material for: PdAu-based nanotheranostic agent for photothermally initiated and oxygen-independent free radical generation
Source: Royal Society of Chemistry journal article supplement (doi:10.1039/d2ce00662f), 2022-01-01
Supplement: d2ce00662f1.pdf [file d2ce00662f1.pdf]

## Supporting Information

### **PdAu-based nanotheranostic agent for photothermal initiation and oxygen-independent free radicals generation**

Feng Wang,<sup>ab</sup> Zaoxia Sun,<sup>c</sup> Zhuo Wang,<sup>d</sup> Junxun Zhou,<sup>e</sup> and Lining Sun<sup>\*ab</sup>

<sup>a</sup> Department of Chemistry, College of Sciences, Shanghai University, Shanghai 200444, P.R. China. E-mail: [lnsun@shu.edu.cn](mailto:lnsun@shu.edu.cn)

<sup>b</sup> Research Center of Nano Science and Technology, College of Sciences, Shanghai University, Shanghai 200444, P.R. China.

<sup>c</sup> Institute of Nanochemistry and Nanobiology, Shanghai University, Shanghai 200444, P.R. China.

<sup>d</sup> State Key Laboratory of Marine Resource Utilization in South China Sea, Special Glass Key Lab of Hainan Province, Hainan University, Haikou 570228, P.R. China.

<sup>e</sup> Department of Pharmacy, School of Medicine, Shanghai University, Shanghai 200444, P.R. China.

---

### Calculation of the Photothermal Conversion Efficiency

The photothermal conversion efficiency  $\eta$  of APPG nanocomposites was calculated according to the reported method<sup>[1]</sup>. The detailed calculation was using the following eq 1:

$$\eta = \frac{hS(T_{max} - T_{surr}) - Q_{Dis}}{I(1 - 10^{-A_{808}})} \quad (1)$$

where  $h$  is heat transfer coefficient,  $S$  is the surface area of the container,  $T_{max}$  is the equilibrium temperature,  $T_{surr}$  is the ambient temperature of the surroundings.  $Q_{Dis}$  is heat losted from light absorbed of the container itself, which was measured independently containing pure water without AIPH-PAPG. And  $A_{808}$  is the absorption intensity of AIPH-PAPG at 808 nm. The value of  $hS$  is derived according to eq. 2:

$$\tau_s = \frac{m_D C_D}{hS} \quad (2)$$

where  $\tau_s$  is the sample system time constant,  $m_D$  and  $C_D$  are the mass and heat capacity of ultrapure water used as the solvent, respectively.

And,  $\tau_s$  can be calculated by eq. 3:

$$t = -\tau_s \ln \theta \quad (3)$$

Time constant for heat transfer from the system is determined to be  $\tau_s = 314.7$  s applying to the linear time data from the cooling period (after 600 s) vs the negative natural logarithm of driving force temperature (Fig. 3c). Substituting the value of  $\tau_s$  into eq 2,  $hS$  can be obtained. And the value of  $hS$  replaced into eq. 1, 808 nm photothermal conversion efficiency  $\eta$  of APPG nanocomposites can be calculated to be 24.6%.

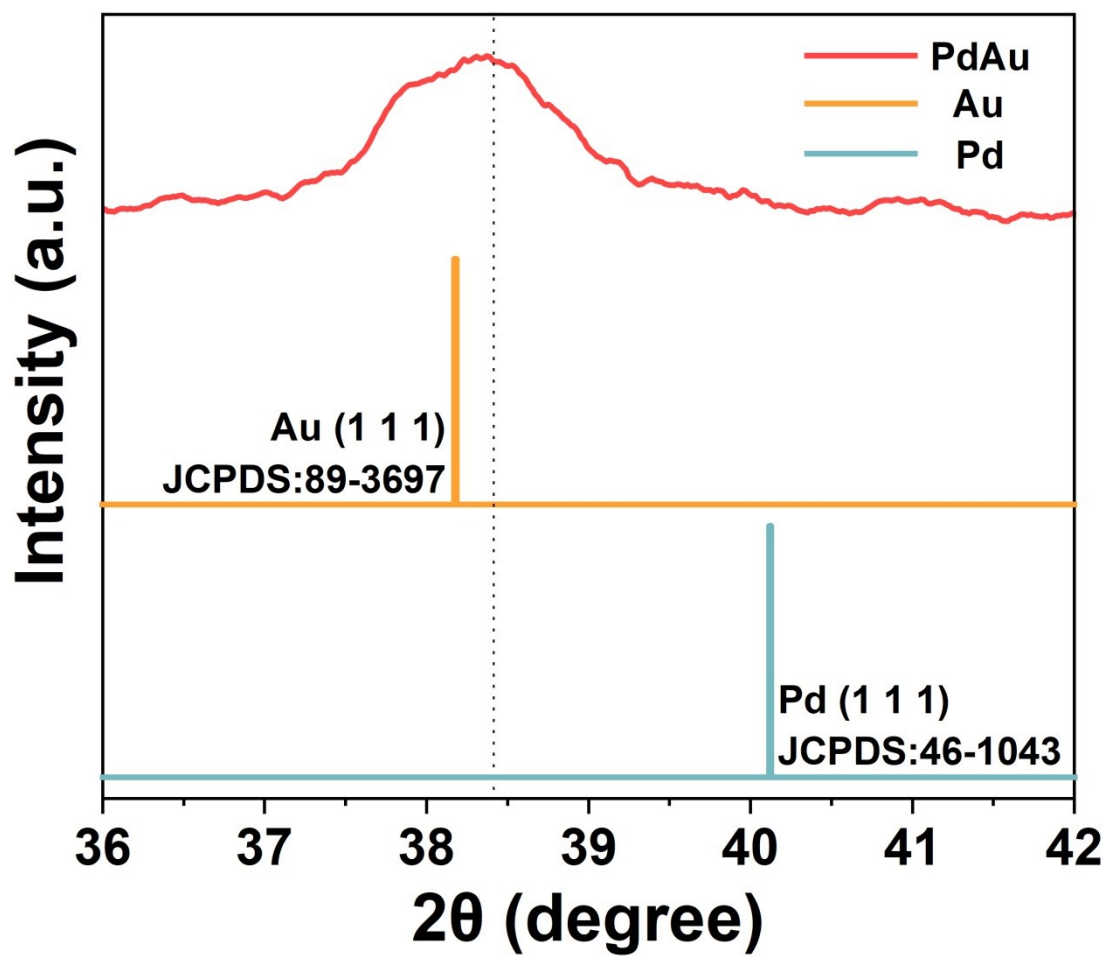

Fig. S1 XRD pattern of PdAu alloy nanoparticles and the corresponding standard cards of Au (JCPDS 89-3697) and Pd (JCPDS 46-1043).

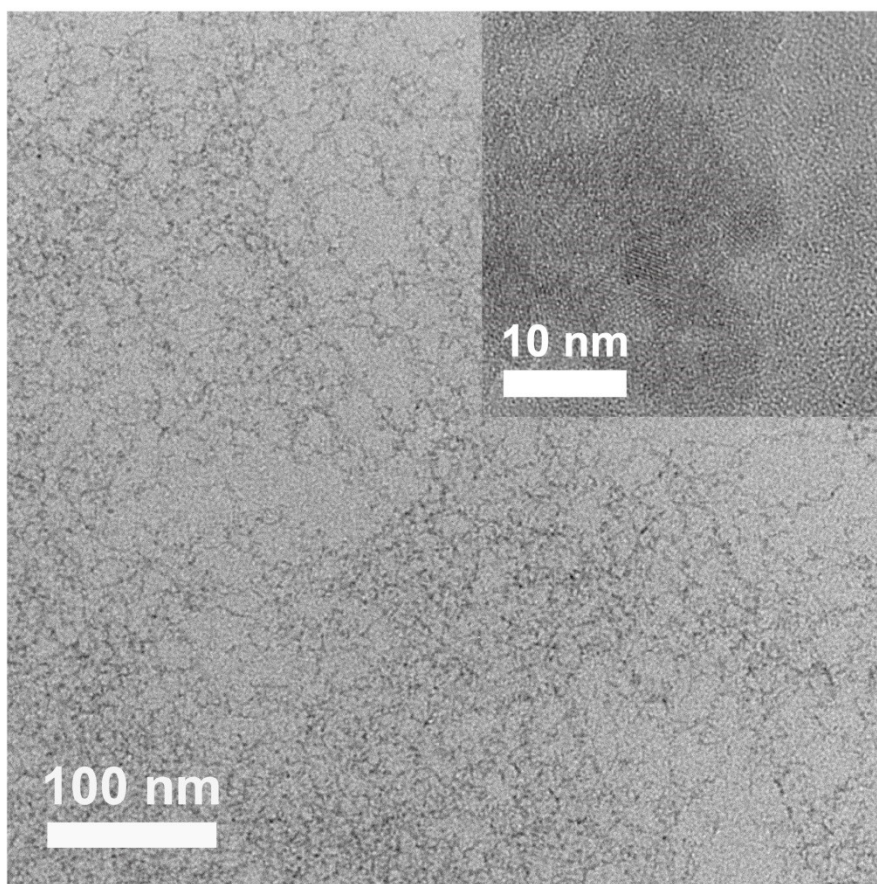

**Fig. S2** TEM image of Gd-BSA complexes. (Inset: HRTEM image of Gd-BSA complexes)

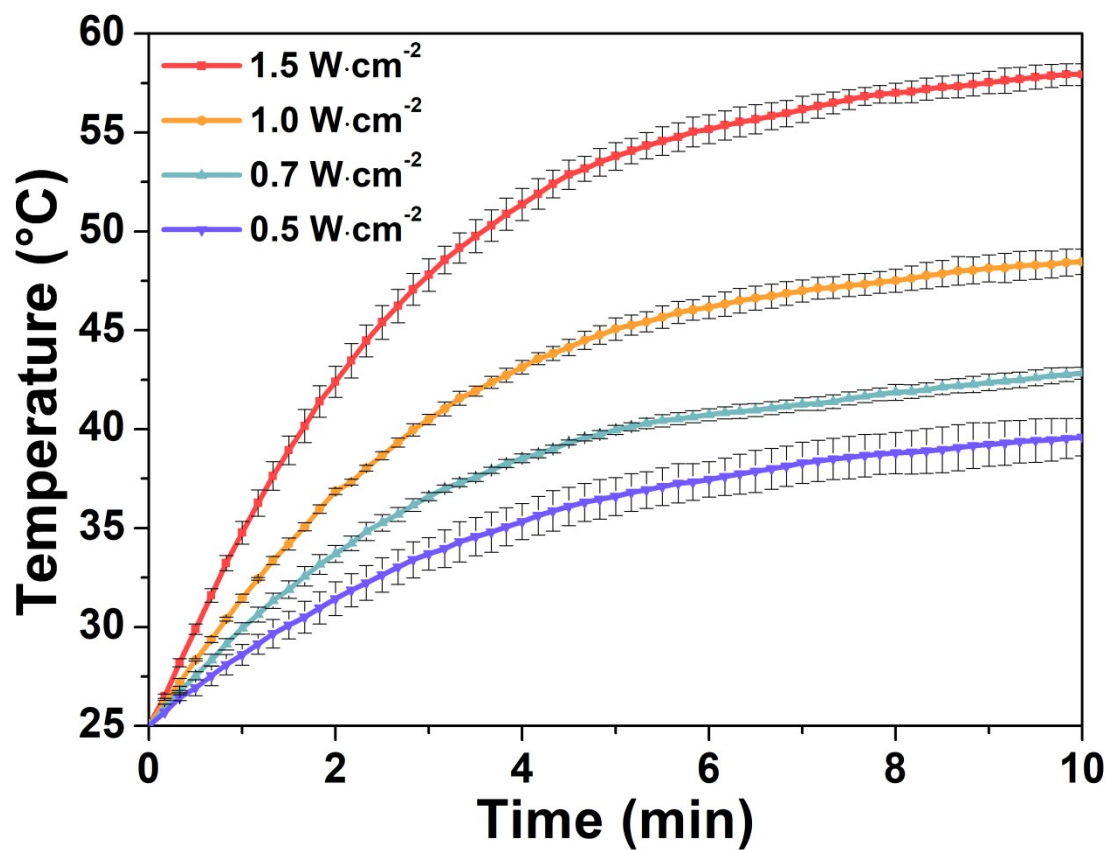

Fig. S3 Photothermal curves of APPG nanocomposites aqueous dispersion ( $400 \mu\text{g}\cdot\text{mL}^{-1}$ ) under varied power densities (0.5, 0.7, 1.0, and 1.5  $\text{W}\cdot\text{cm}^{-2}$ ).

---

## Reference

- [1] D. K. Roper, W. Ahn and M. Hoepfner, *J. Phys. Chem. C*, 2007, **111**, 3636-3641.
